# Supplementary material for: Controllable proton-conducting pathways via situating polyoxometalates in targeting pores of a metal–organic framework
Source: Royal Society of Chemistry journal article supplement (doi:10.1039/c6ta10958f), 2017-01-01
Supplement: c6ta10958f1.pdf [file c6ta10958f1.pdf]

## Supplementary Information

# Controllable proton conducting pathways via situating polyoxometalates in targeting pores of a metal-organic framework

Xuying Lai,<sup>‡<sup>a</sup></sup> Yiwei Liu,<sup>‡<sup>a</sup></sup> Guocheng Yang,<sup>b</sup> Shumei Liu,<sup>a</sup> Zhan Shi,<sup>c</sup> Ying Lu,<sup>a</sup> Fang Luo<sup>a</sup> and Shuxia Liu<sup>\*<sup>a</sup></sup>

<sup>a</sup> Key Laboratory of Polyoxometalate Science of the Ministry of Education, College of Chemistry, Northeast Normal University, Changchun, Jilin 130024, China

<sup>b</sup> School of Chemistry and Life Science, Changchun University of Technology, Changchun, Jilin 130012, China

<sup>c</sup> State Key Laboratory of Inorganic Synthesis and Preparative Chemistry, College of Chemistry, Jilin University, Changchun, Jilin 130012, China

\* Corresponding author: liusx@nenu.edu.cn.

‡ These authors contributed equally to this work.

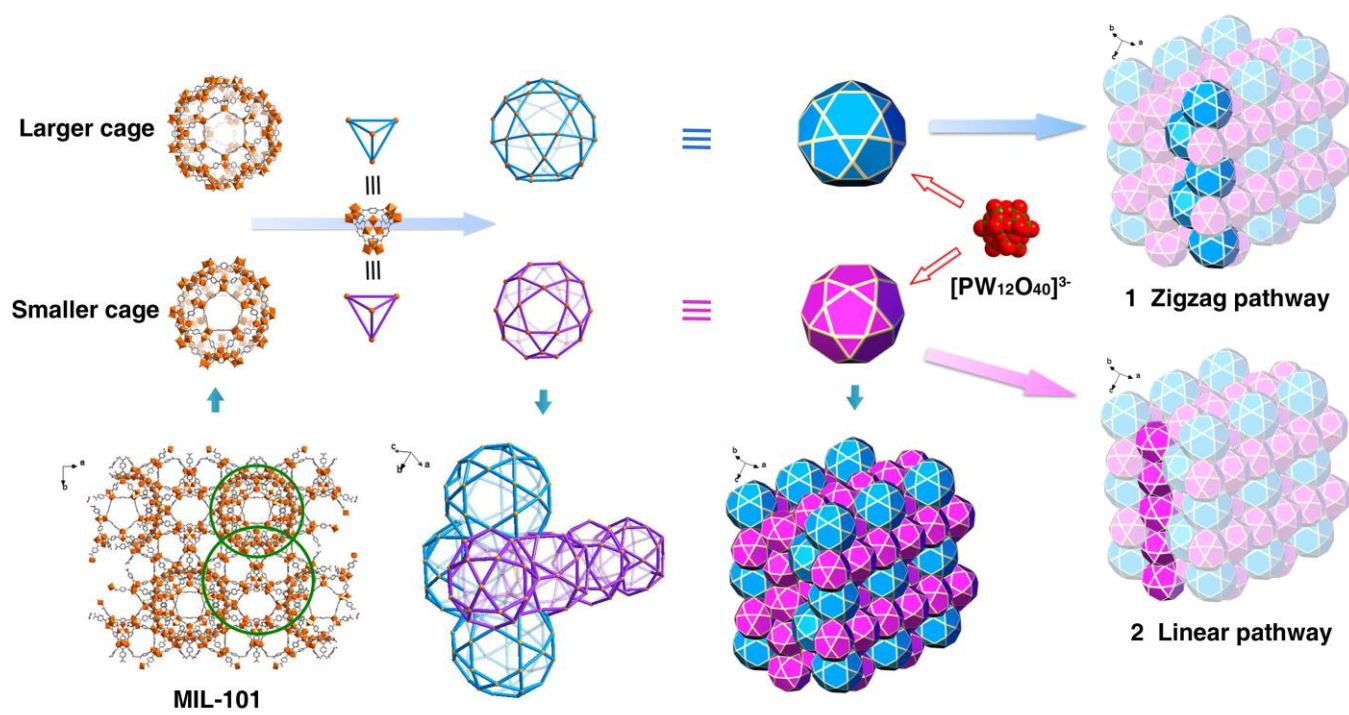

**Figure S1.** Structural and tiling representation of MIL-101 displaying coexistent two types of tunnels. Two types of proton conducting pathways were obtained by loading HPW into one of the two kinds of cages in MIL-101, respectively.

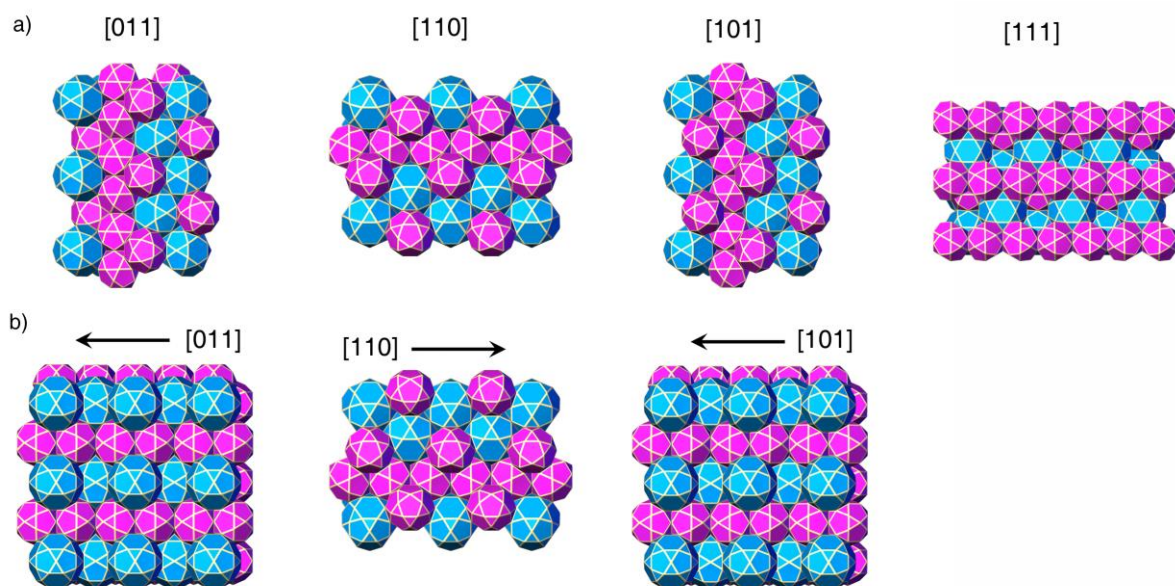

**Figure S2.** Zigzag and linear tunnels respectively constructed by larger and smaller cages are always arranged in parallel not only a) within [011], [110], [101], and [111] facets but also b) along [011], [110], and [101] facets orientation.

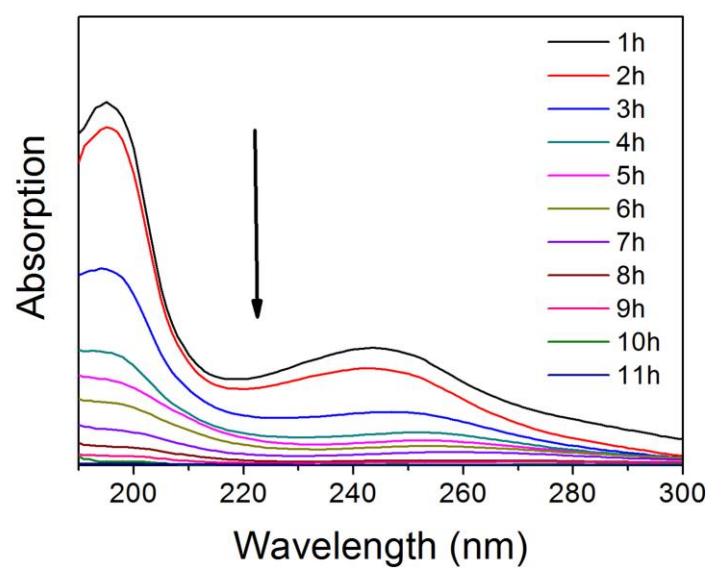

**Figure S3.** The UV-vis spectrum of HPW leaching from **3** each hour. **3** was suspended in water and the aqueous solution containing HPW was changed with deionized water and sampled each hour.

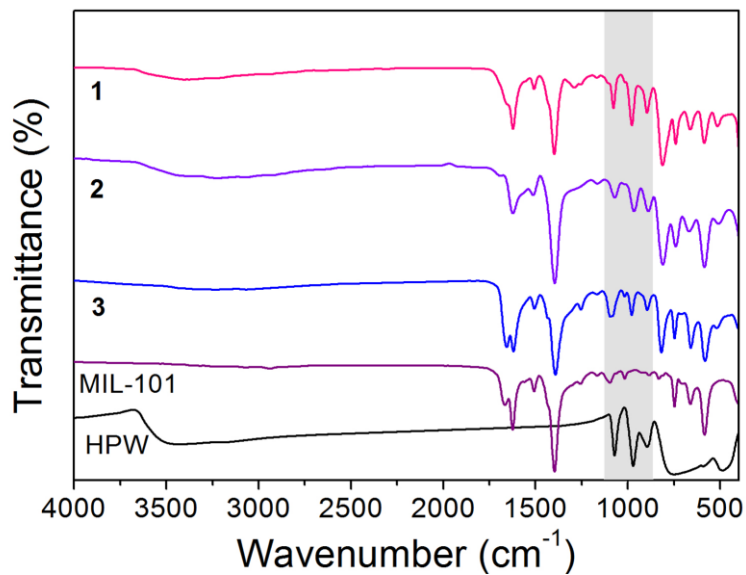

**Figure S4.** IR spectra of HPW (black), MIL-101 (purple), **1** (pink), **2** (light purple), and **3** (blue).

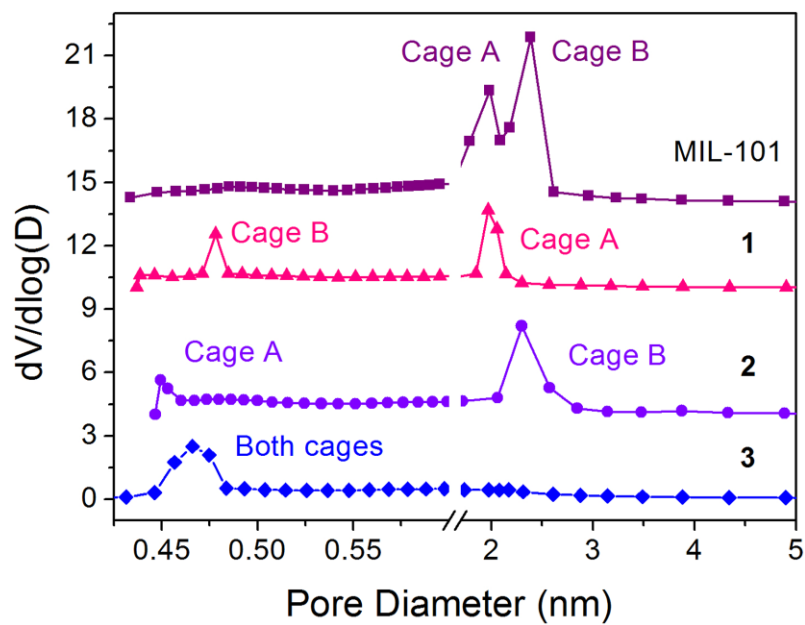

**Figure S5.** Pore size distributions for **1-3** and MIL-101.

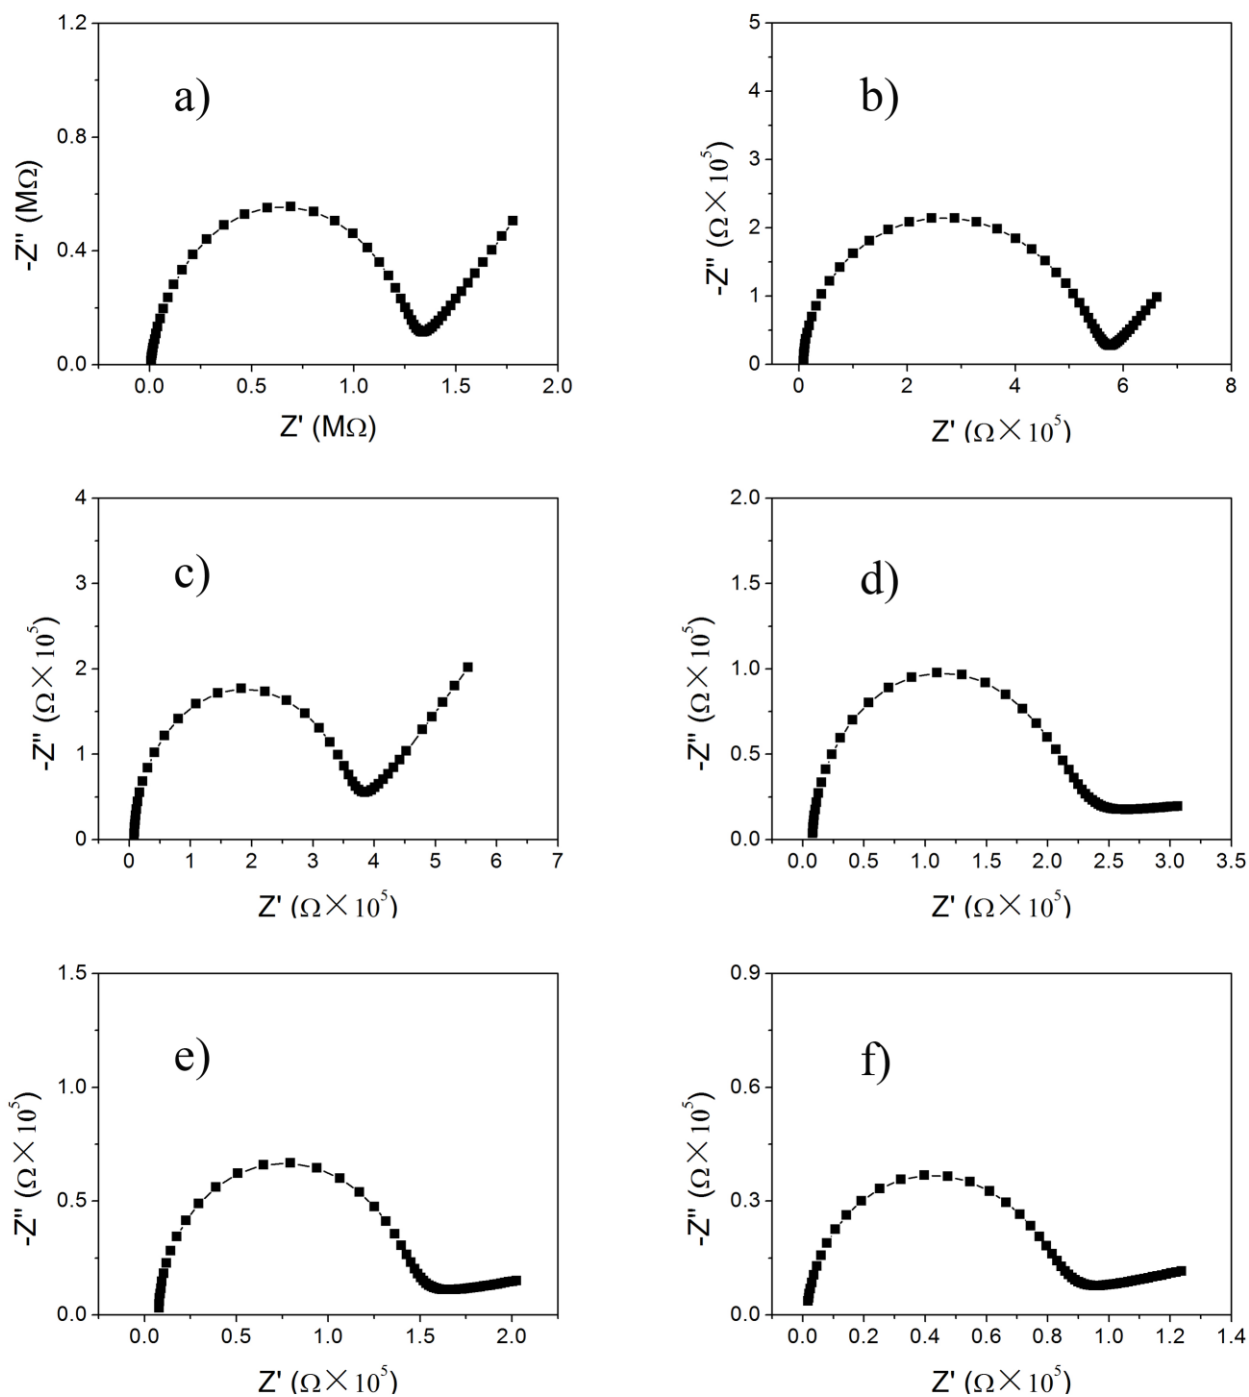

**Figure S6.** Nyquist plots of **1** at 100% RH and various temperatures (a) 25 °C, (b) 40 °C, (c) 50 °C, (d) 60 °C, (e) 70 °C, (f) 80 °C.

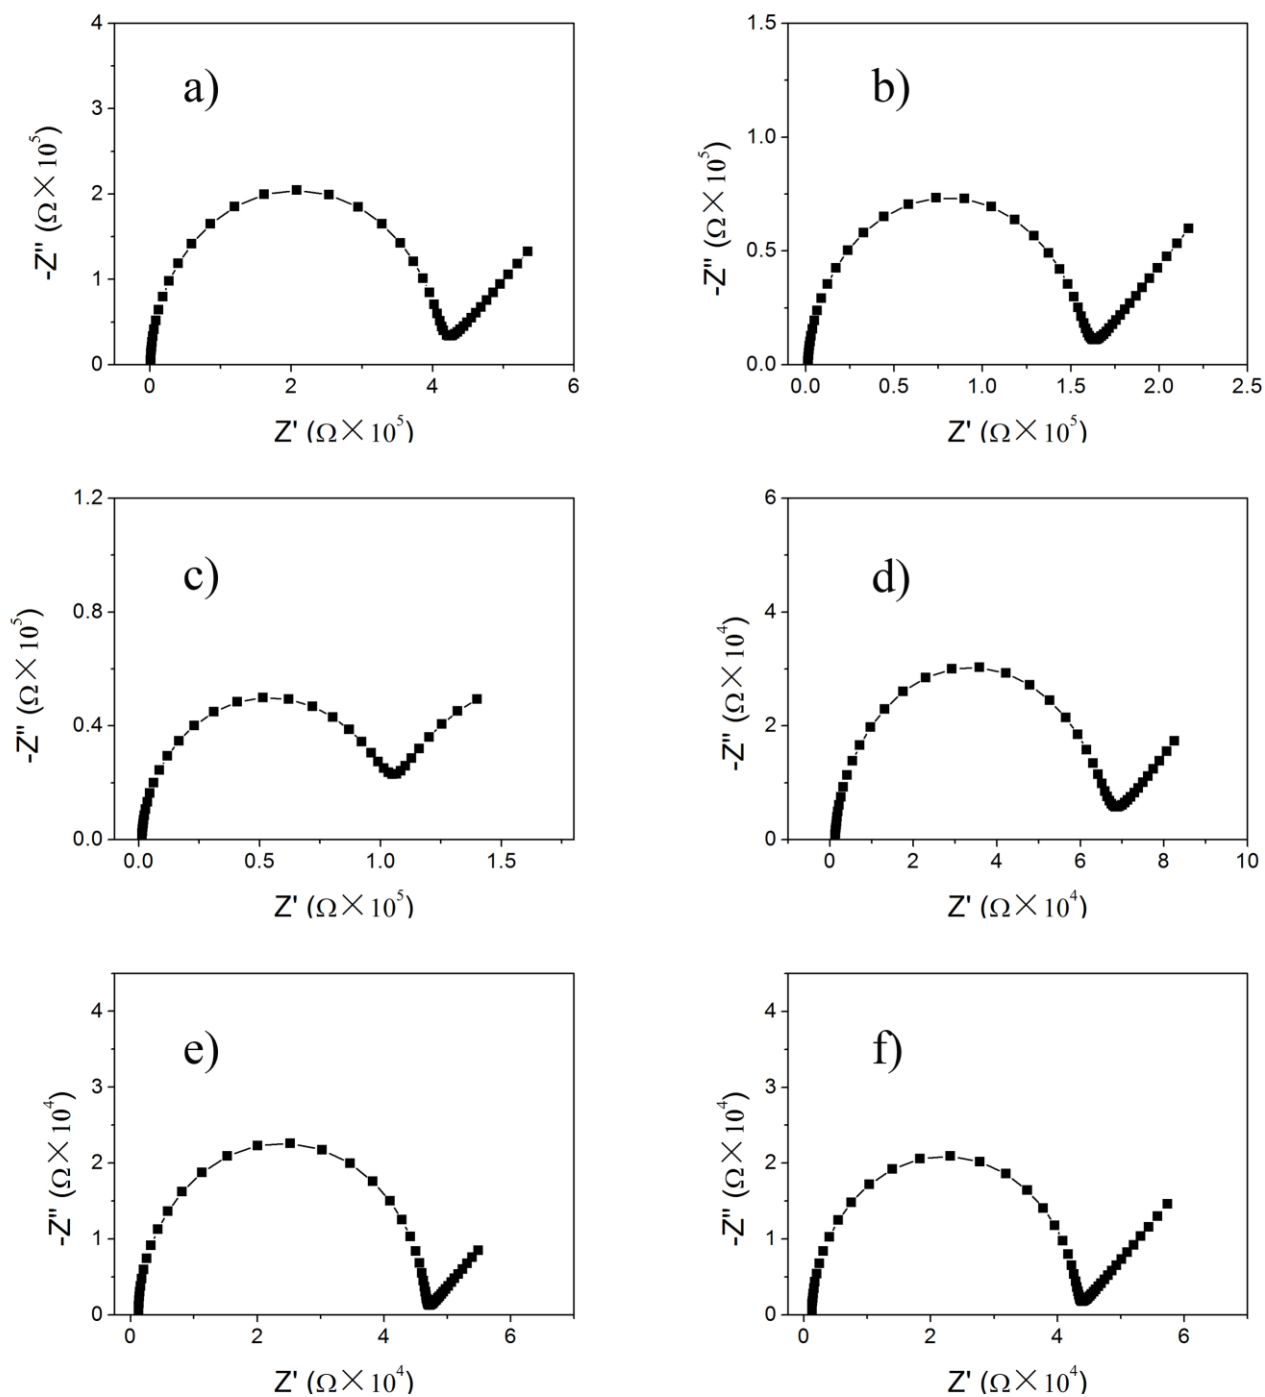

**Figure S7.** Nyquist plots of **2** at 100% RH and various temperatures (a) 25 °C, (b) 40 °C, (c) 50 °C, (d) 60 °C, (e) 70 °C, (f) 80 °C.

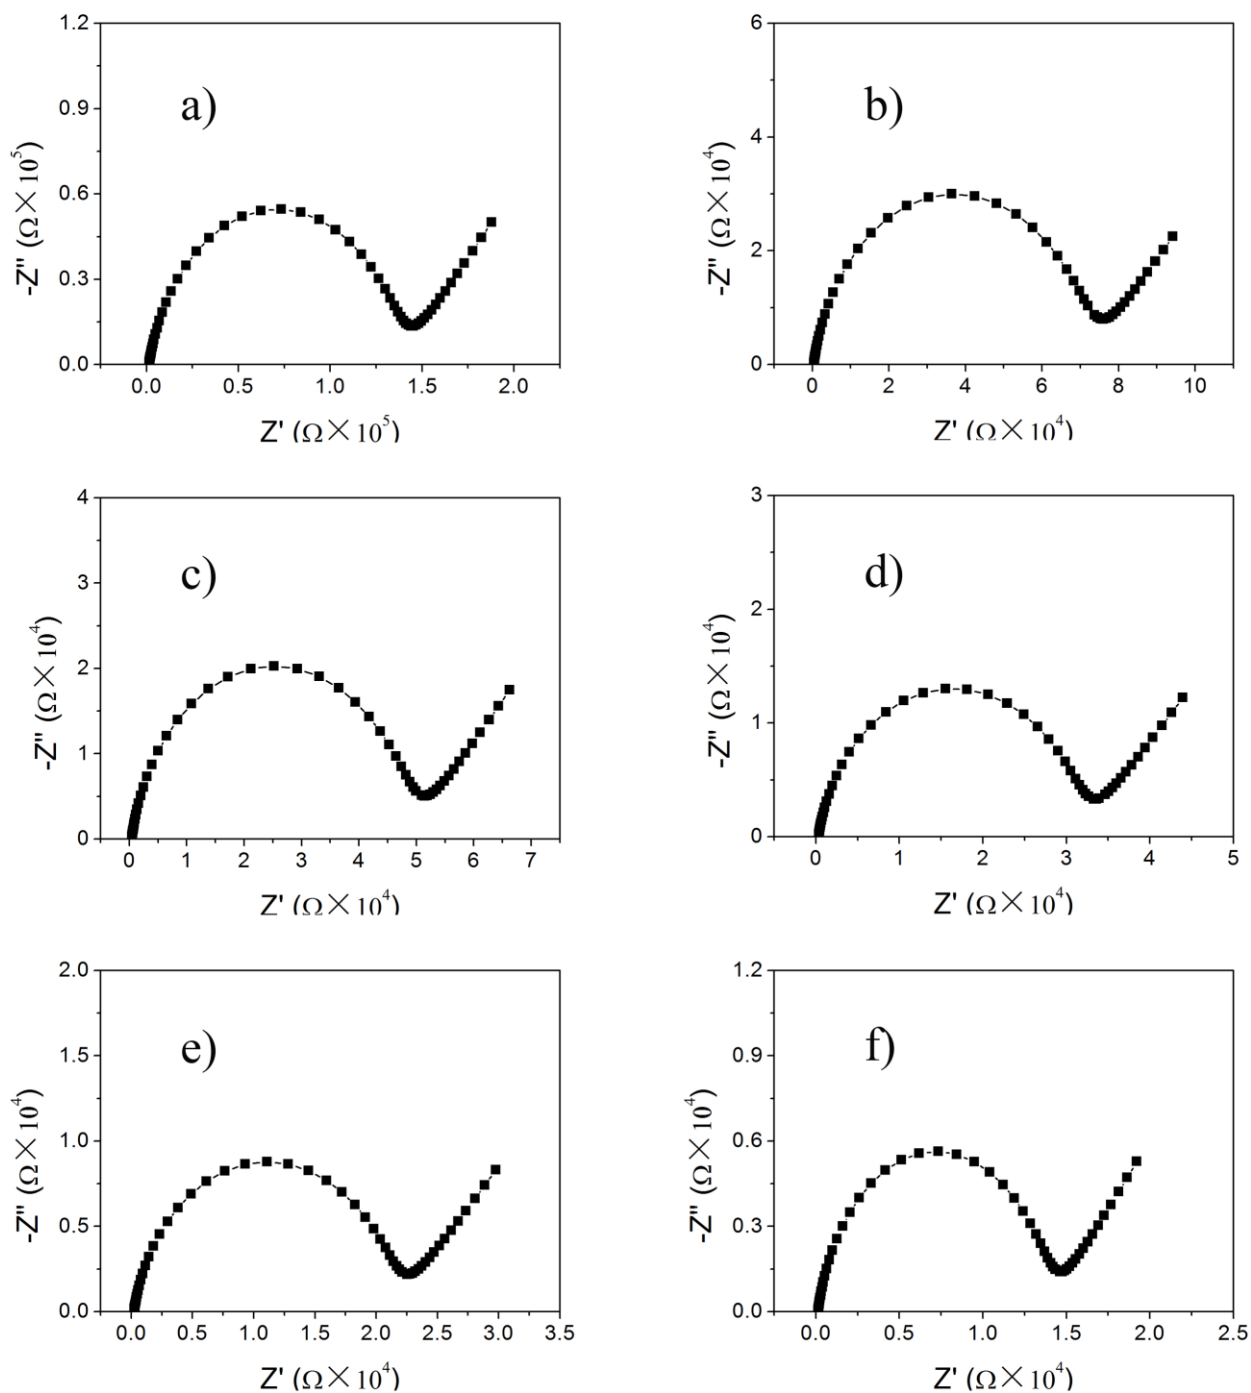

**Figure S8.** Nyquist plots of **3** at 100% RH and various temperatures (a) 25 °C, (b) 40 °C, (c) 50 °C, (d) 60 °C, (e) 70 °C, (f) 80 °C.



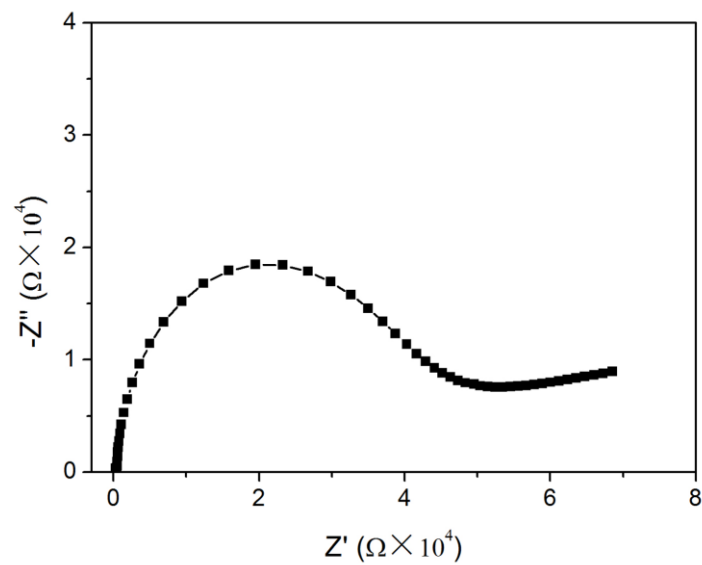

**Figure S9.** Nyquist plot of **2'** at 80°C 100% RH.

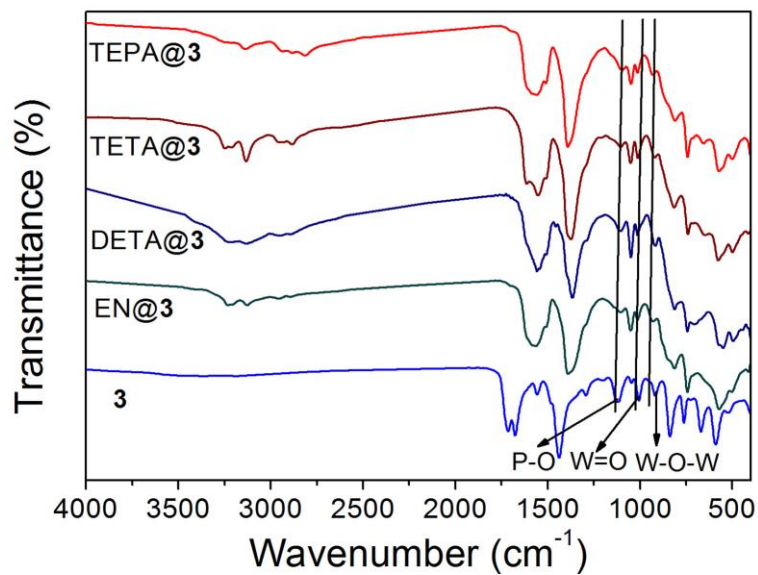

**Figure S10.** IR spectra of **3** (blue), **EN@3** (green), **DETA@3** (dark blue), **TETA@3** (dark red), and **TEPA@3** (red).

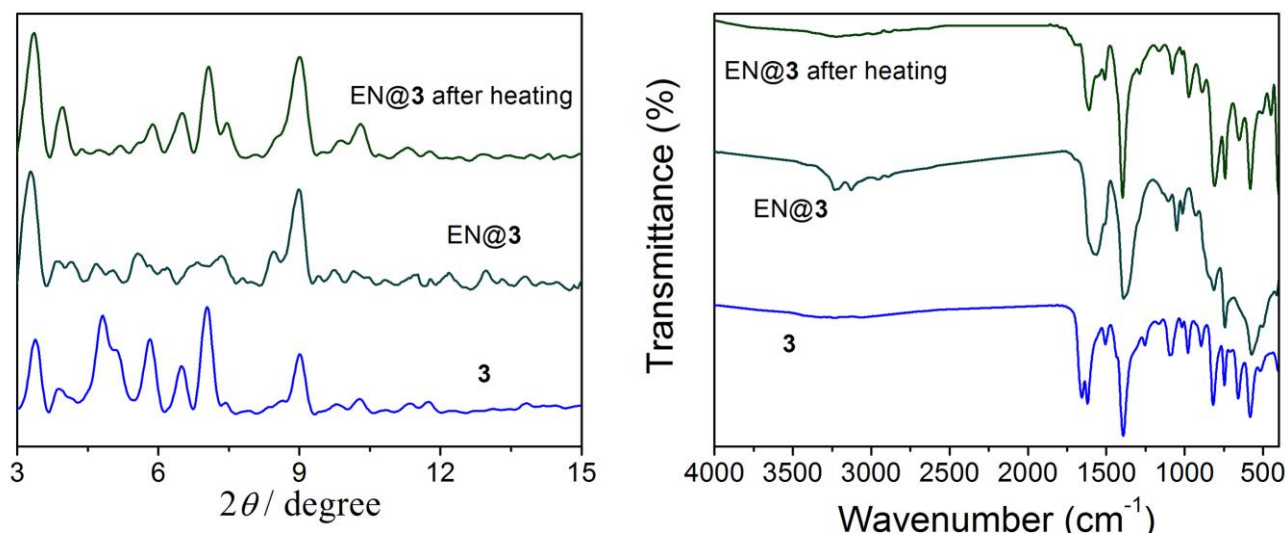

**Figure S11.** PXRD patterns (left) and IR spectra (right) of **3**, **EN@3**, and **EN@3** after heating for EN elimination.

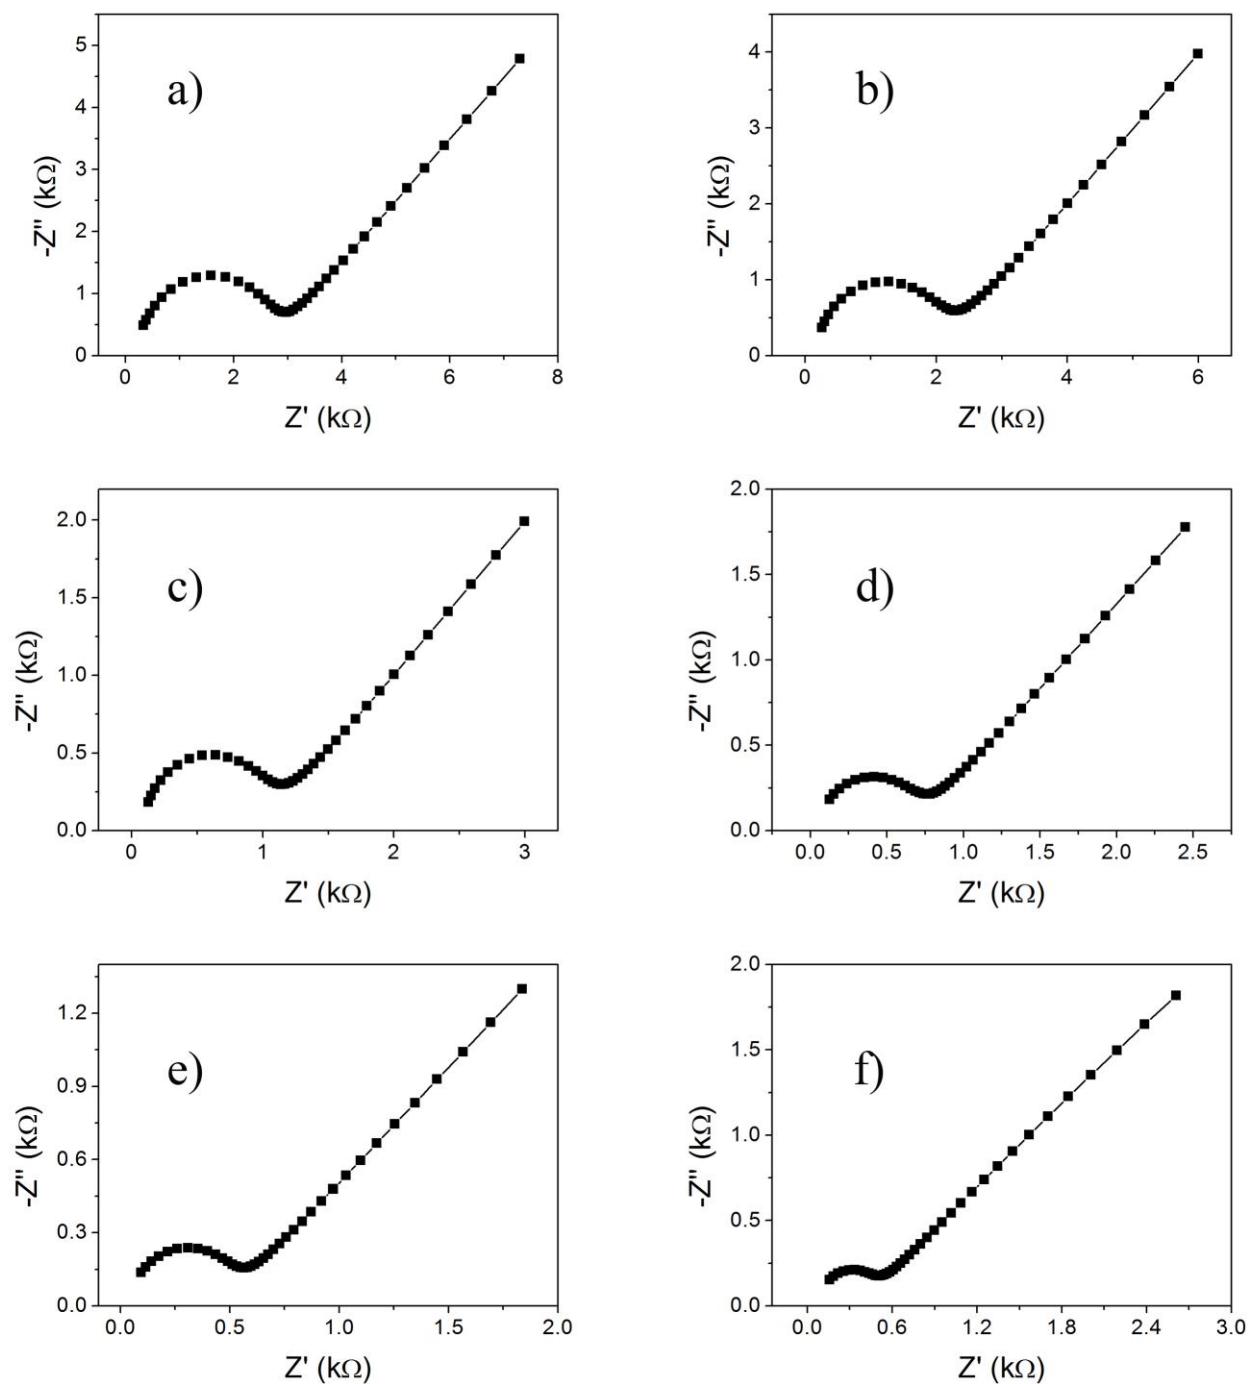

**Figure S12.** Nyquist plots of EN@3 at 100% RH and various temperatures (a) 25 °C, (b) 40 °C, (c) 50 °C, (d) 60 °C, (e) 70 °C, (f) 80 °C.

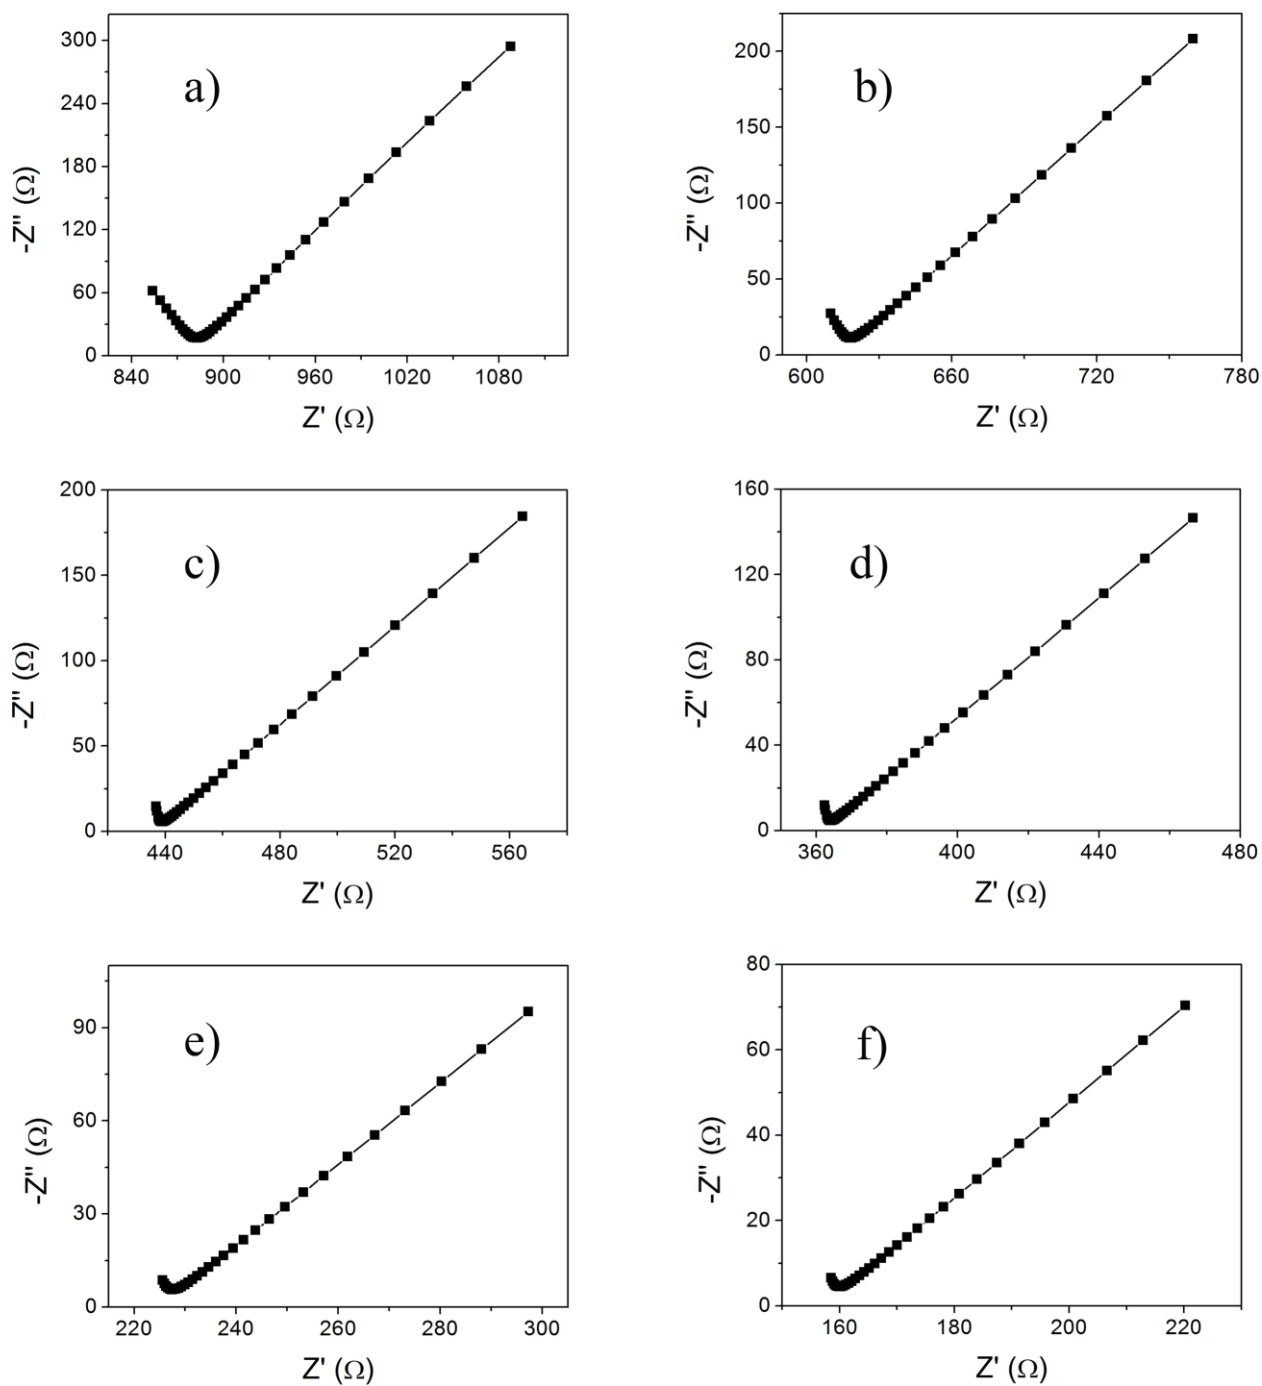

**Figure S13.** Nyquist plots of DETA@3 at 100% RH and various temperatures (a) 25 °C, (b) 40 °C, (c) 50 °C, (d) 60 °C, (e) 70 °C, (f) 80 °C.

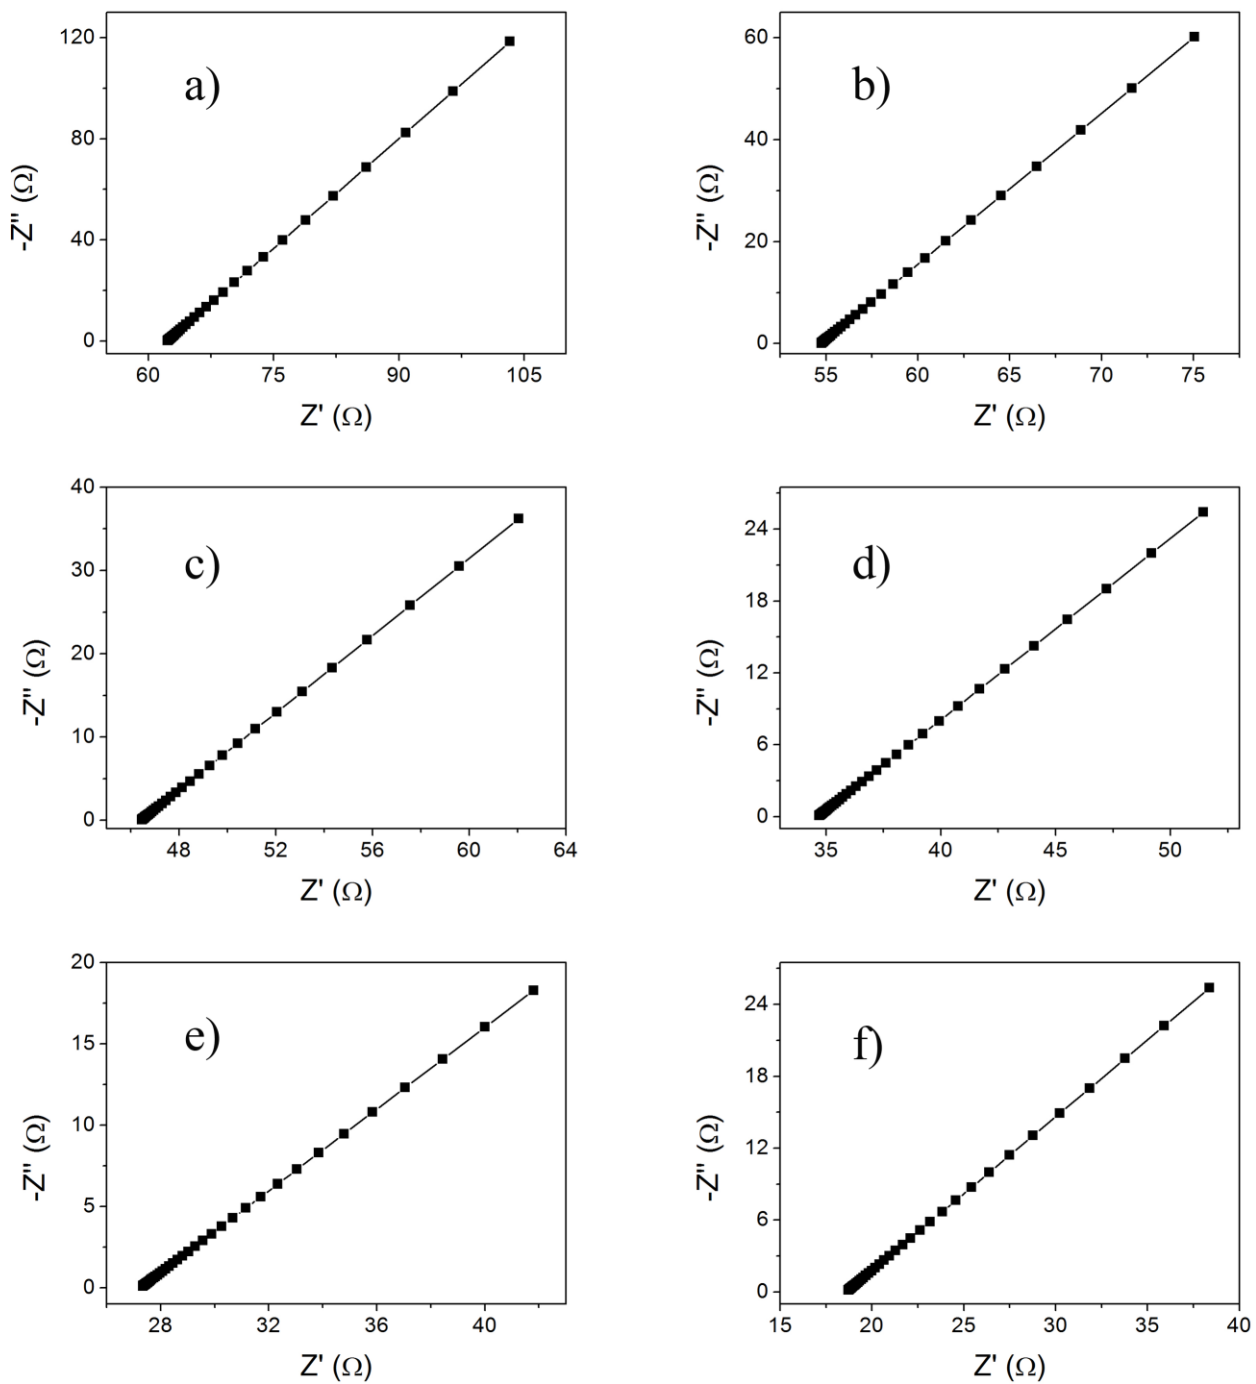

**Figure S14.** Nyquist plots of TETA@3 at 100% RH and various temperatures (a) 25 °C, (b) 40 °C, (c) 50 °C, (d) 60 °C, (e) 70 °C, (f) 80 °C.

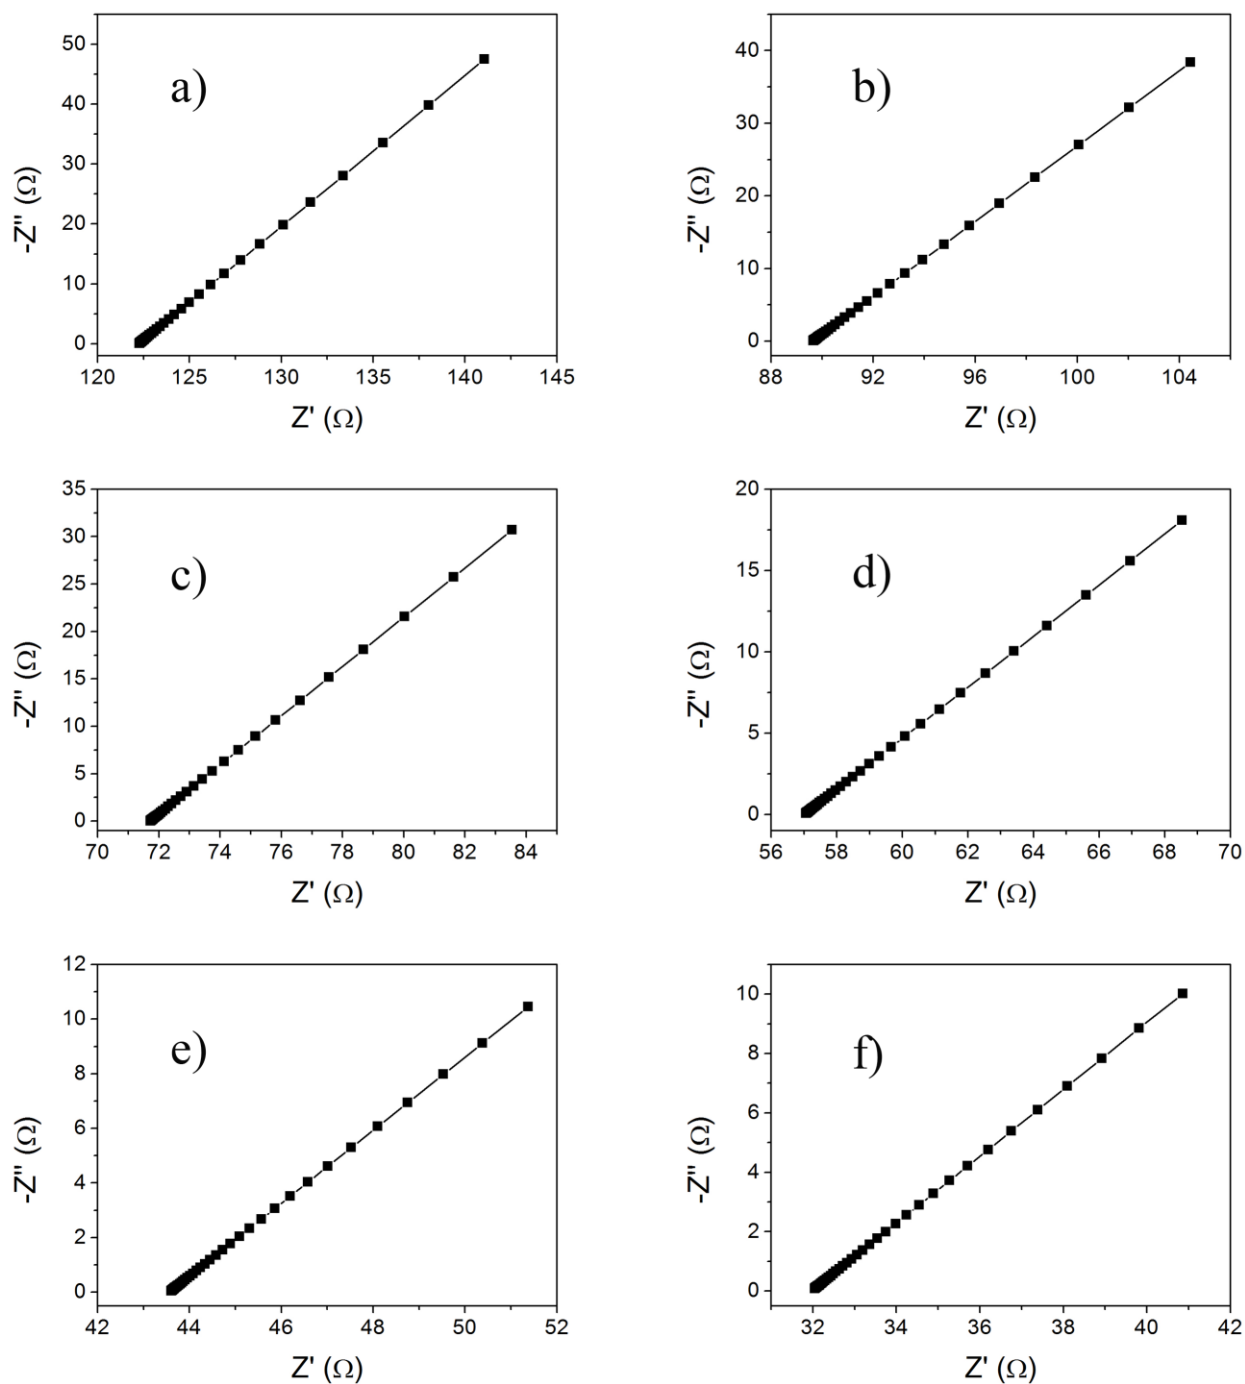

**Figure S15.** Nyquist plots of TEPA@3 at 100% RH and various temperatures (a) 25 °C, (b) 40 °C, (c) 50 °C, (d) 60 °C, (e) 70 °C, (f) 80 °C.

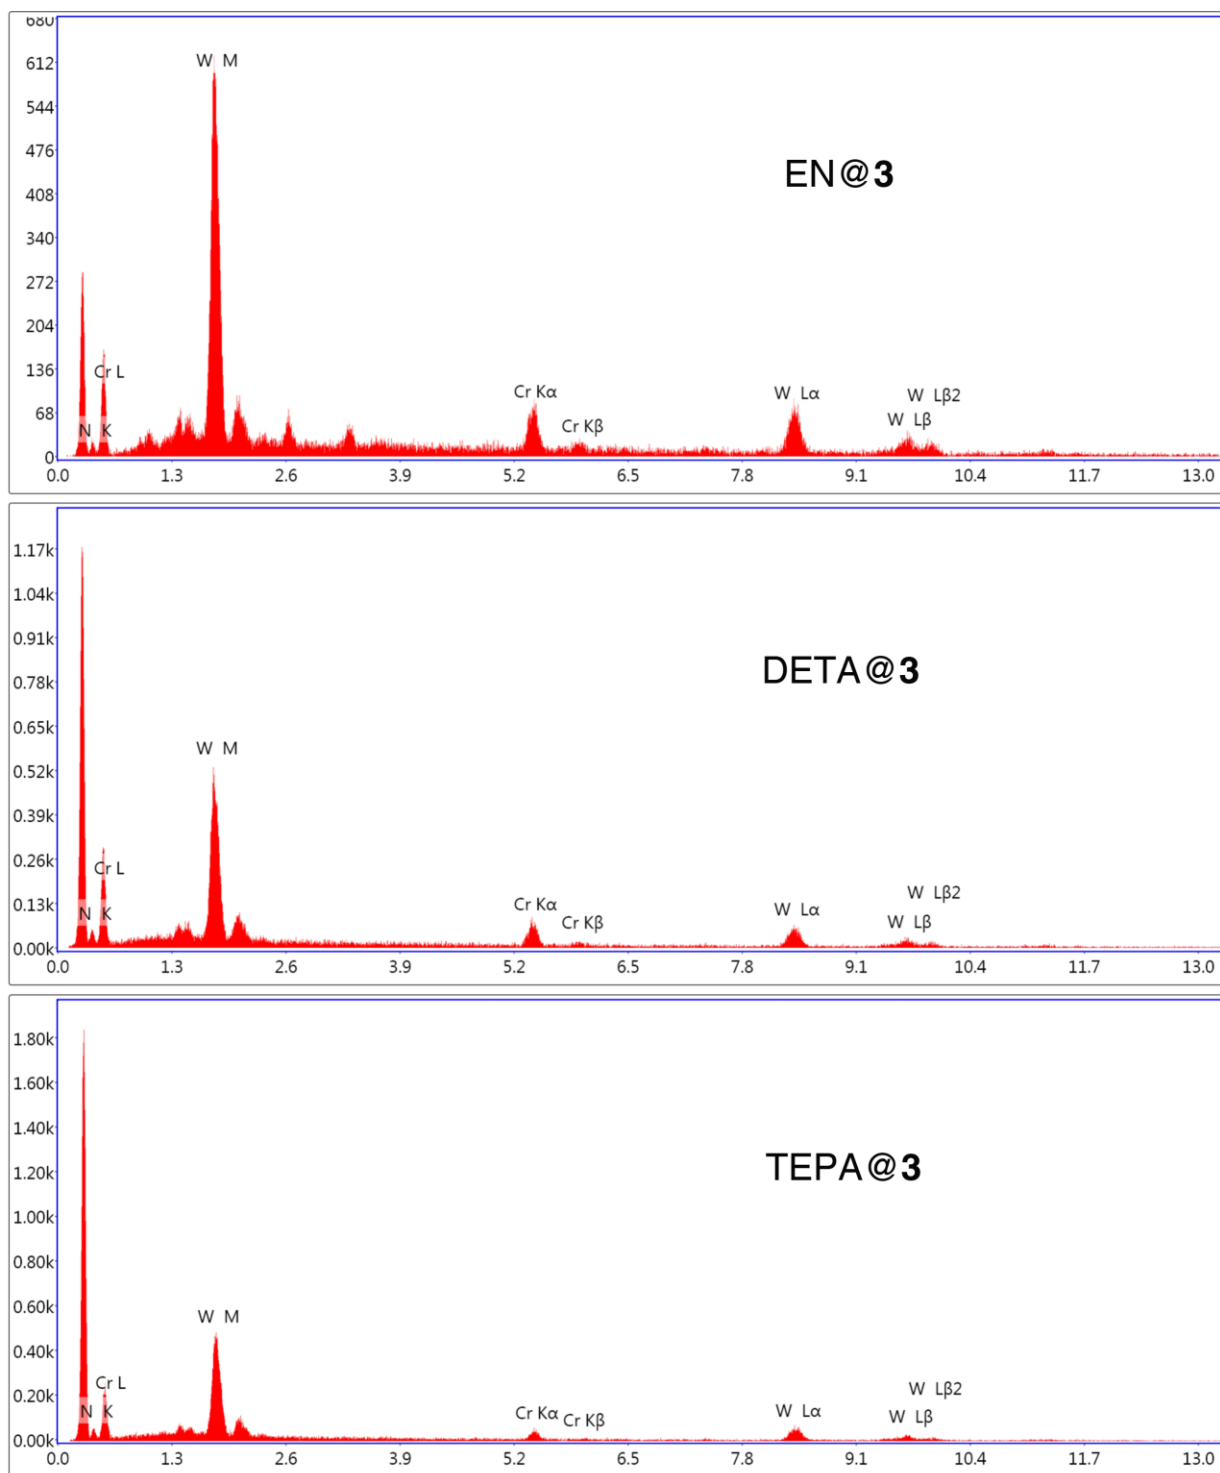

**Figure S16.** EDX spectrums for EN@3, DETA@3, and TEPA@3.

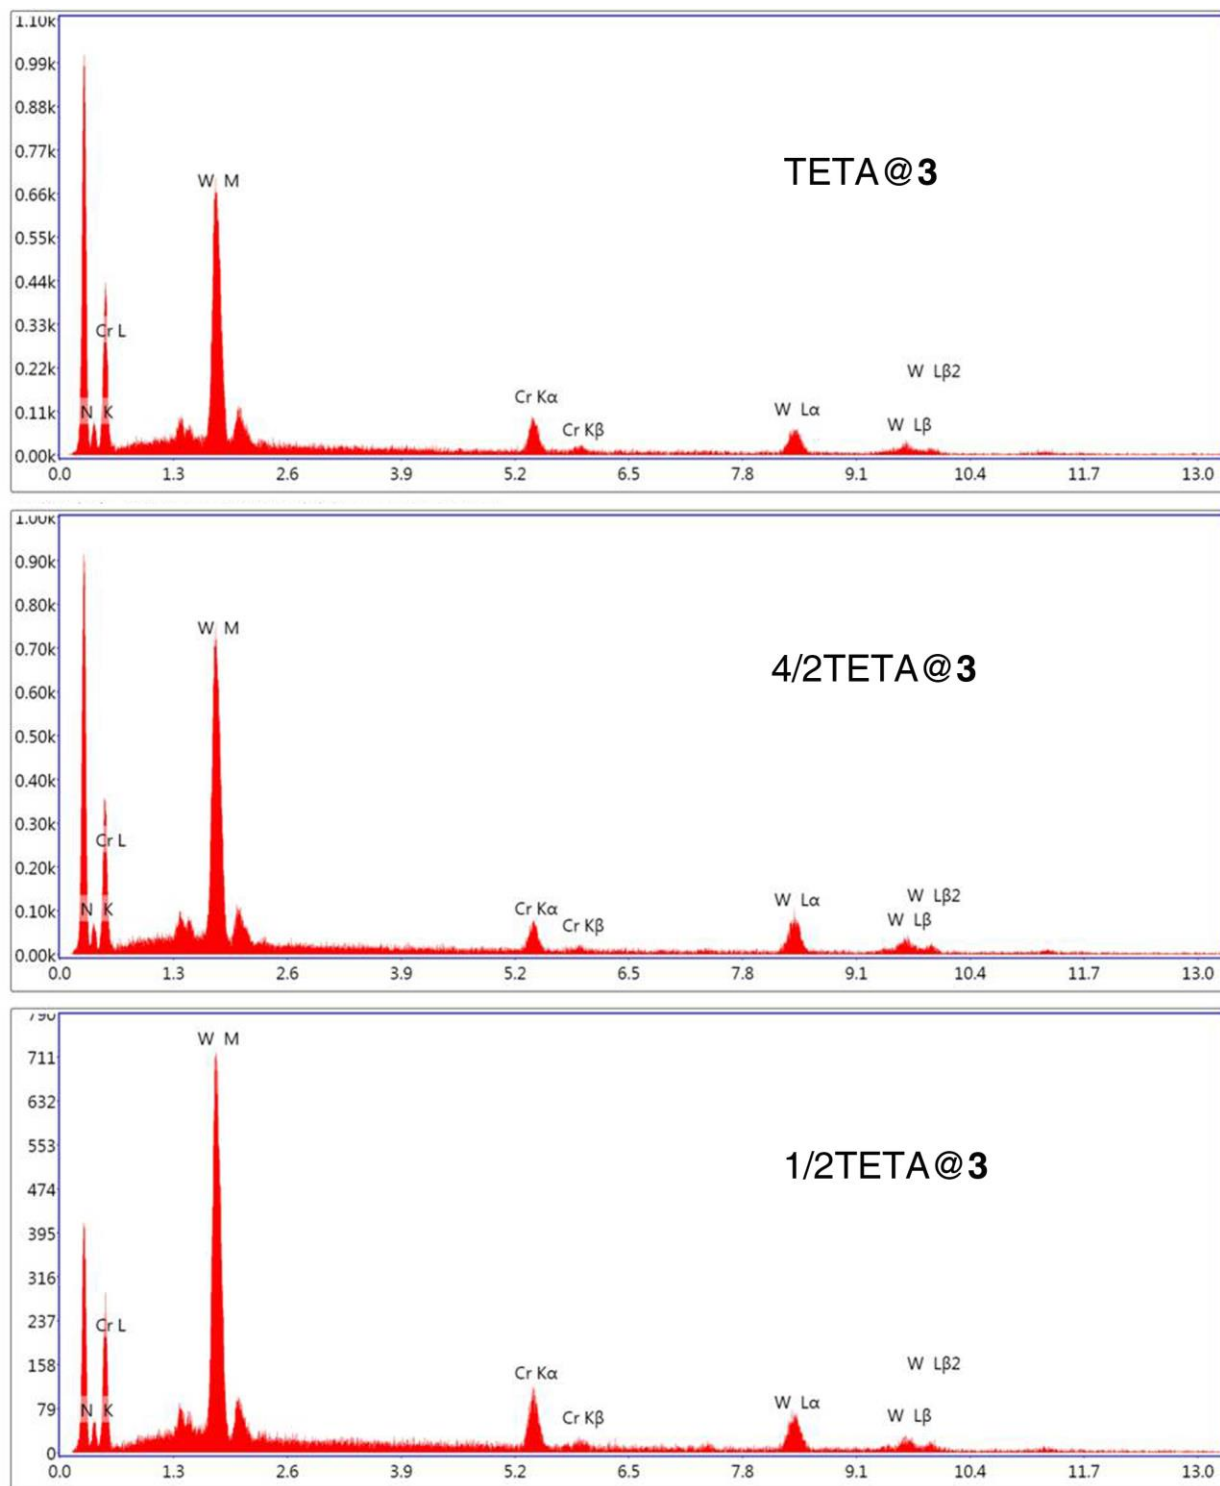

**Figure S17.** EDX spectra for TETA@3, 4/2TETA@3, and 1/2TETA@3.



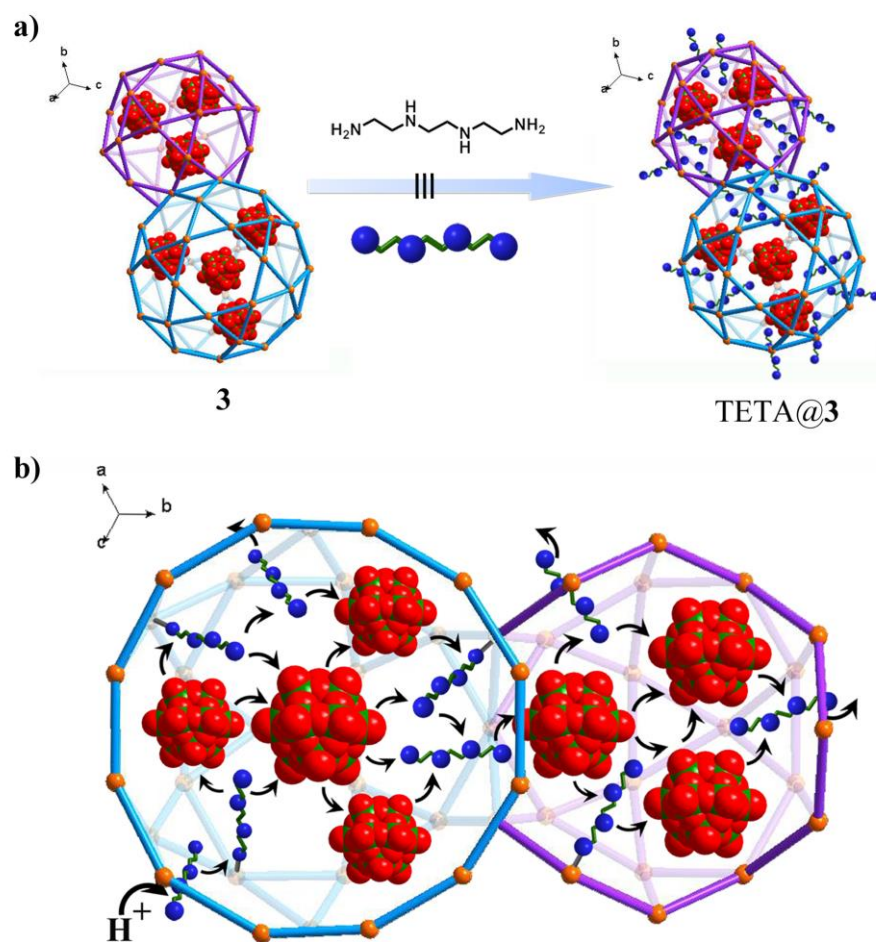

**Figure S18.** a) Schematic illustration for the preparations of TETA@3. b) The possible proton-conducting behaviors in TETA@3 under 100% RH ( $\text{H}_2\text{O}$  has been omitted in the model for clarify).

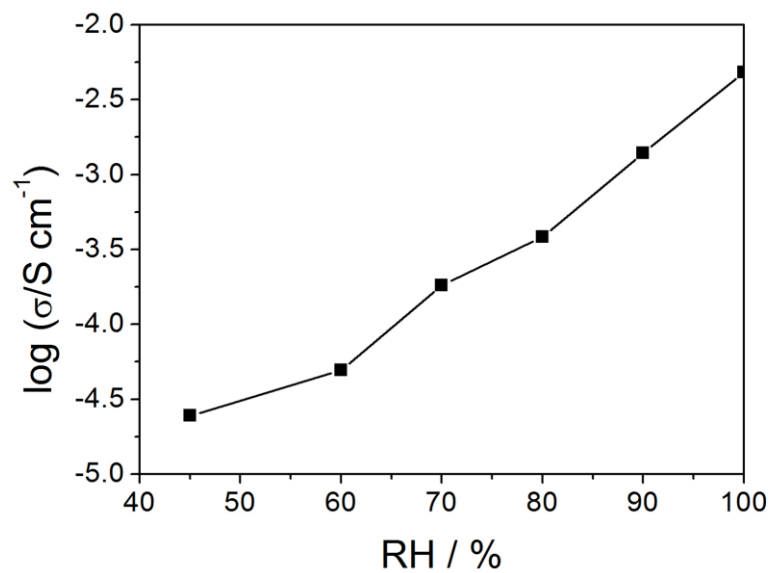

**Figure S19.** RH dependence of proton conductivity in TETA@3 at 25 °C.

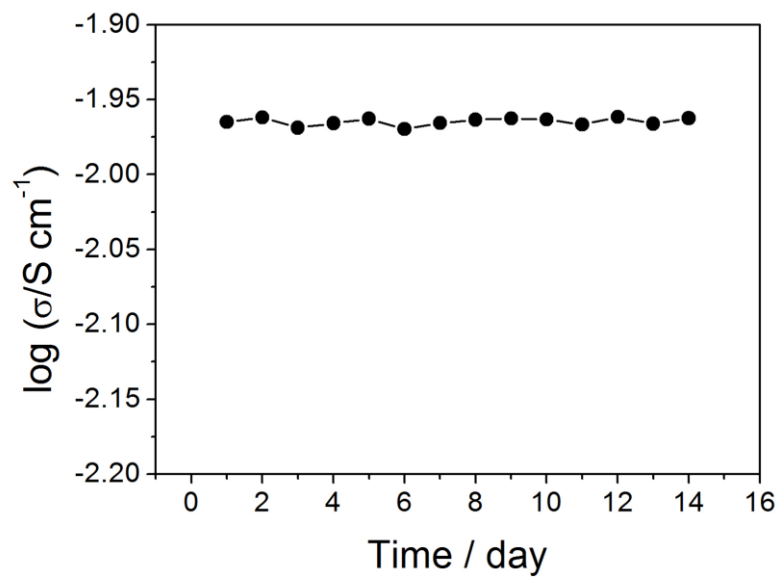

**Figure S20.** Time dependence of conductivity of TETA@3 at 80 °C and 100% RH.

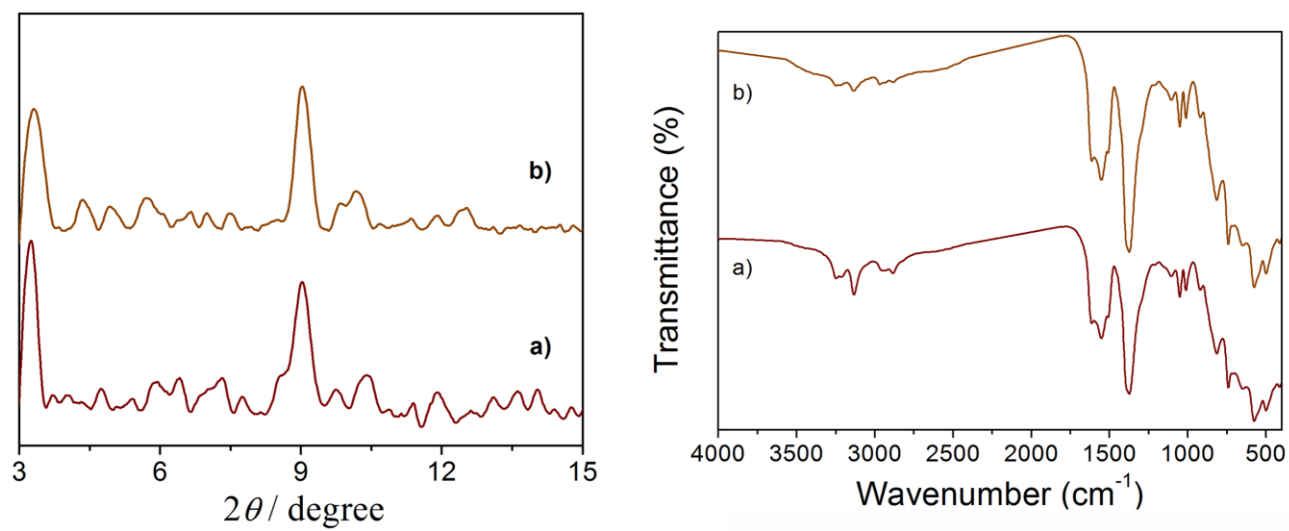

**Figure S21.** PXRD patterns (left) and IR spectra (right) of TETA@3 before a) and after b) the impedance measurement.
